# Supplementary material for: Akt3 Regulates the Tissue-Specific Response to Copaiba Essential Oil
Source: PubMed Central journal article supplement (PMC7216139; doi:10.3390/ijms21082851), 2020-04-19
Supplement: ijms-21-02851-s001.pdf [file ijms-21-02851-s001.pdf]

Supplementary Materials for

## **Akt3 Regulates the Tissue-Specific Response to Copaiba Essential Oil**

Yasuyo Urasaki<sup>1</sup>, Cody Beaumont<sup>2</sup>, Jeffery N. Talbot<sup>1</sup>, David K. Hill<sup>2</sup>, Thuc T. Le<sup>1,\*</sup>

<sup>1</sup>College of Pharmacy, Roseman University of Health Sciences, 10530 Discovery Drive, Las Vegas, NV 89135, USA.

<sup>2</sup>dōTERRA International, LLC, 389 South 1300 West, Pleasant Grove, Utah 84062, USA.

\*To whom correspondence should be addressed: Email: [tle5@roseman.edu](mailto:tle5@roseman.edu); Tel: 1-702-802-2820

**A**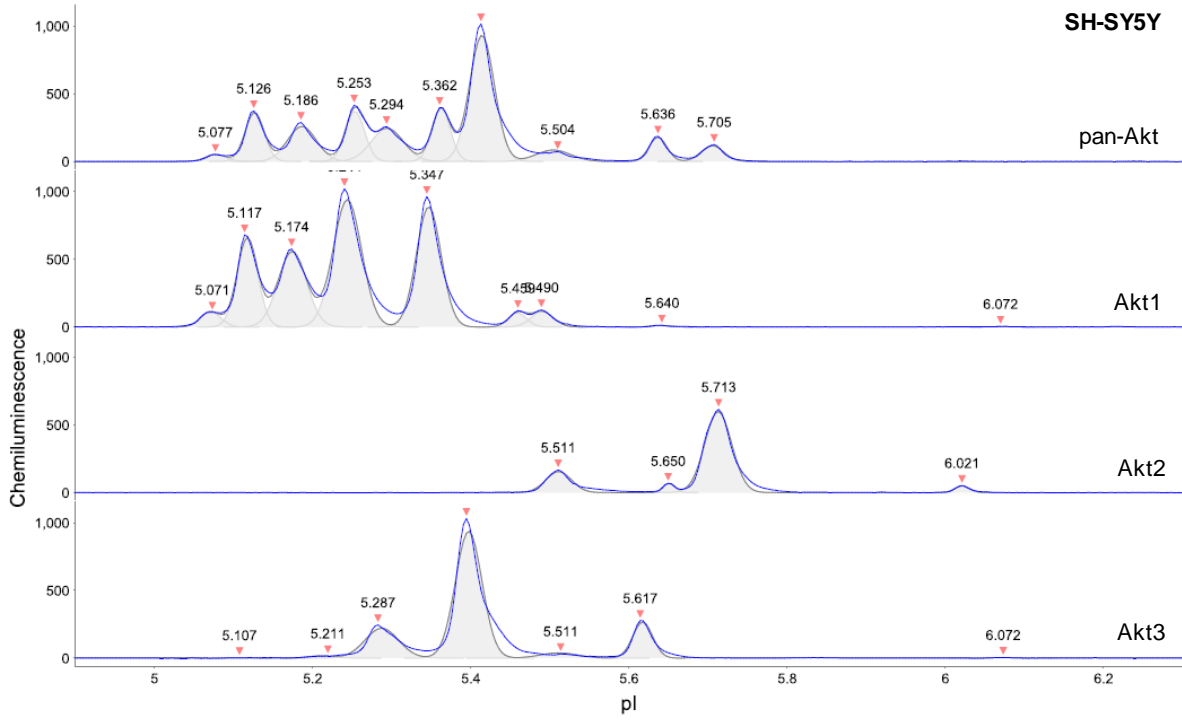**B**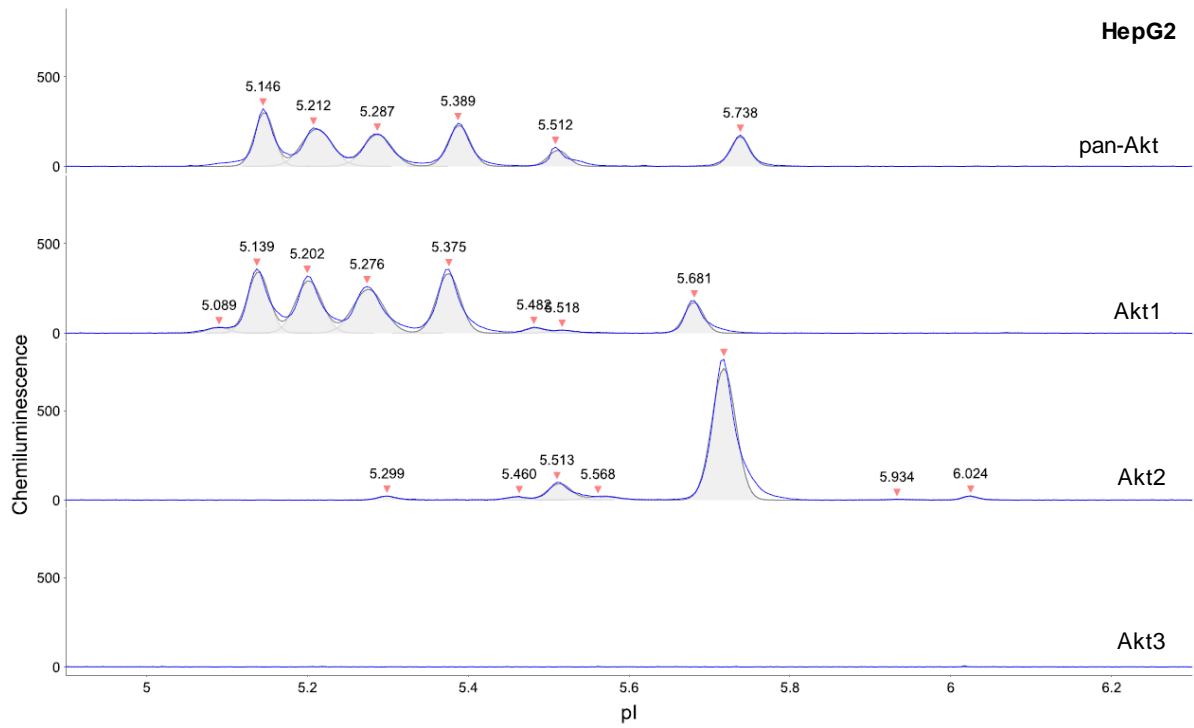

**C**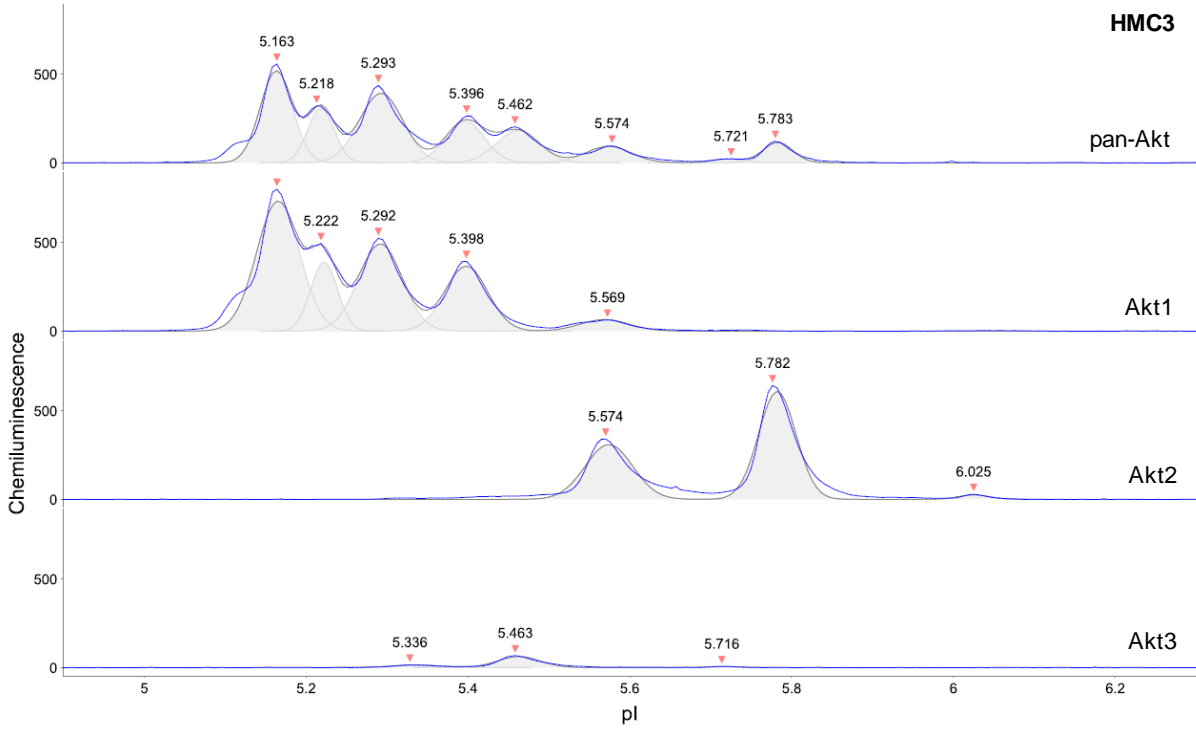**D**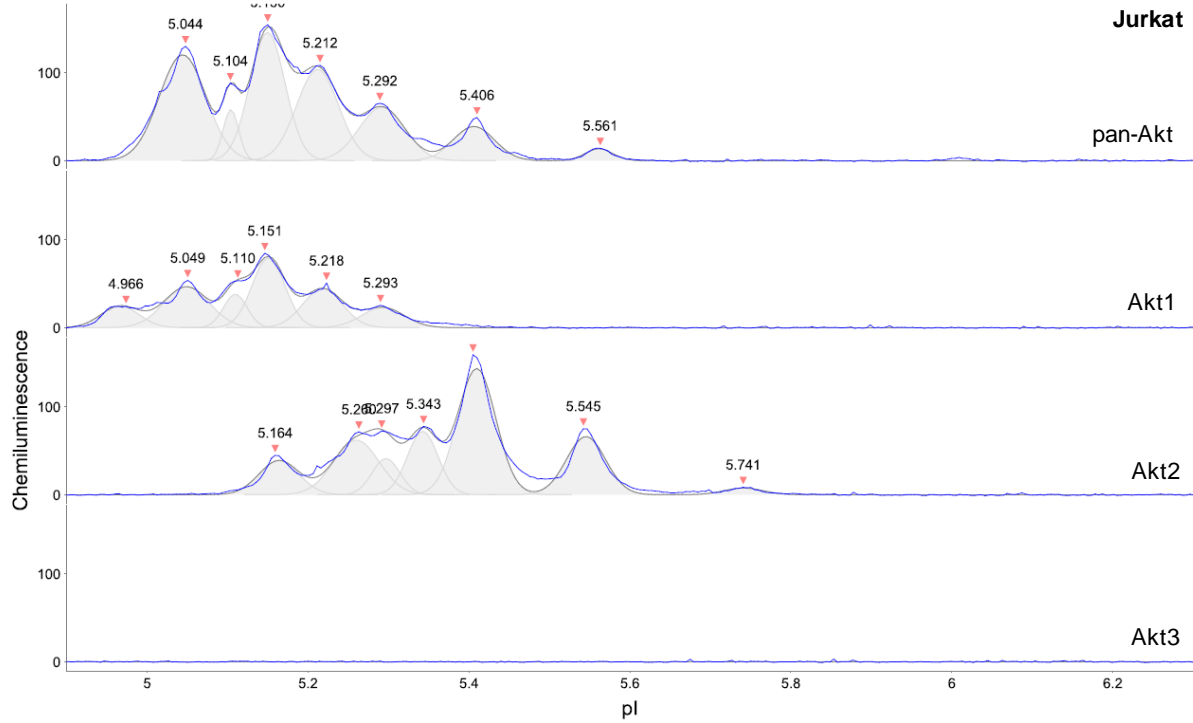

**E**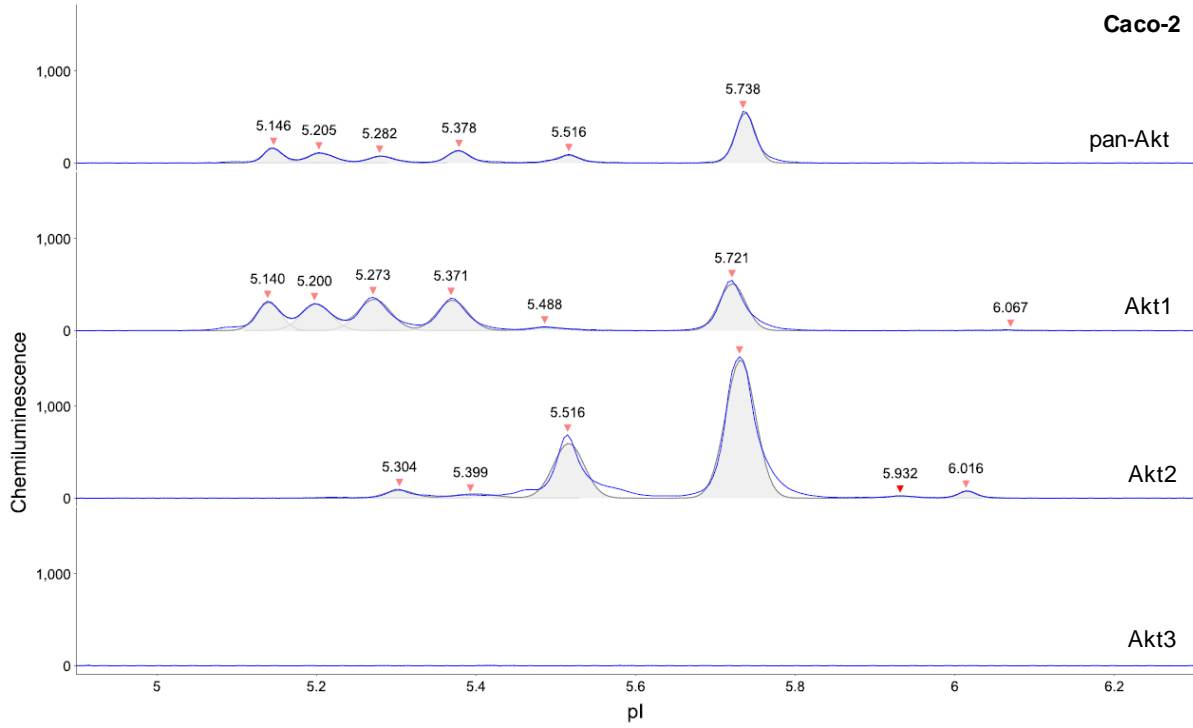**F**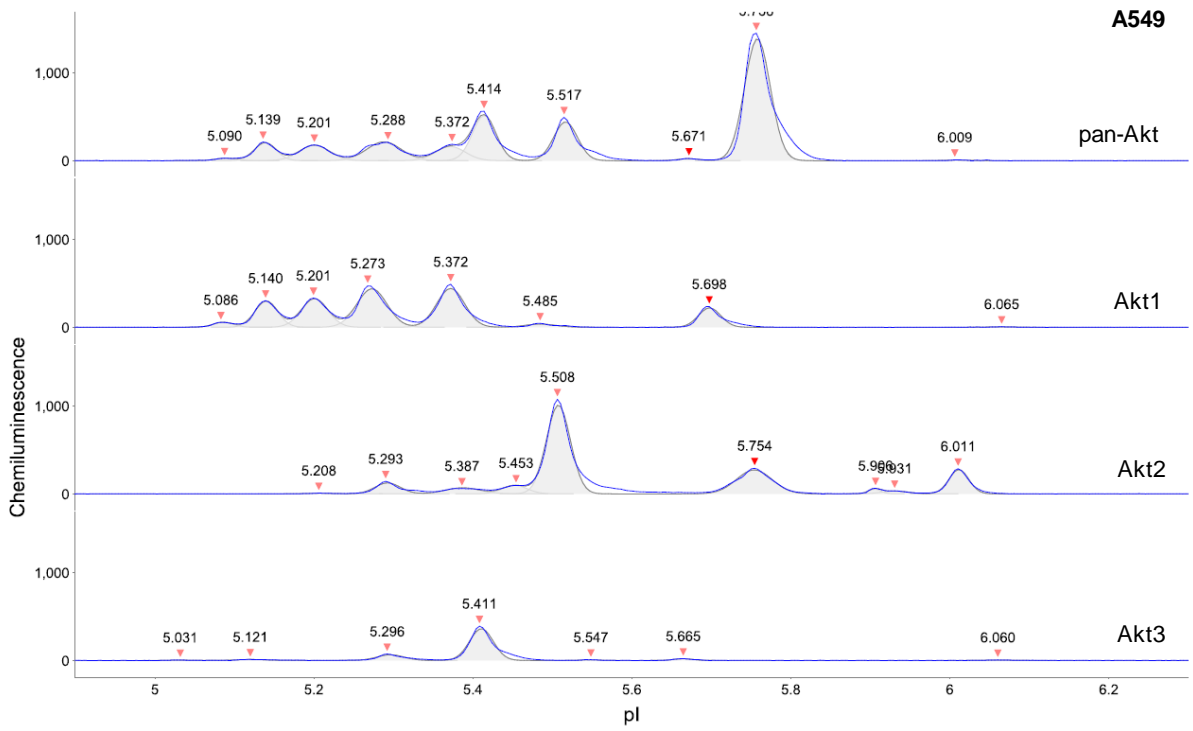

**G**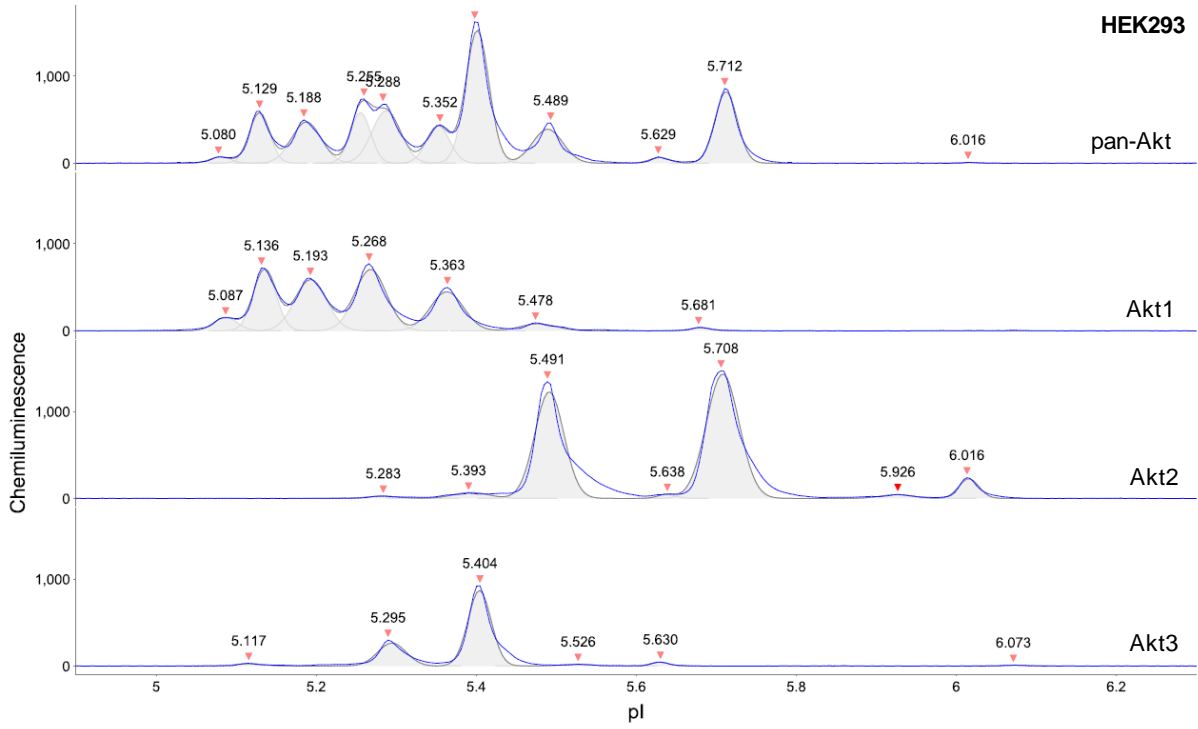**H**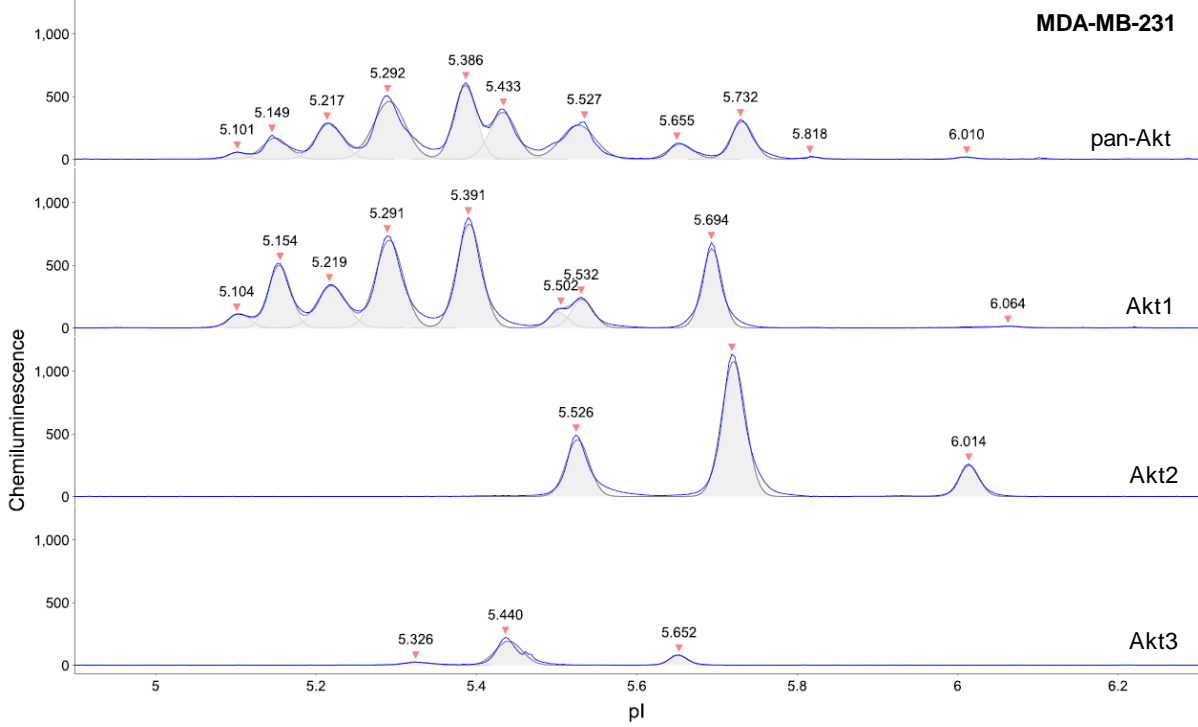

**I**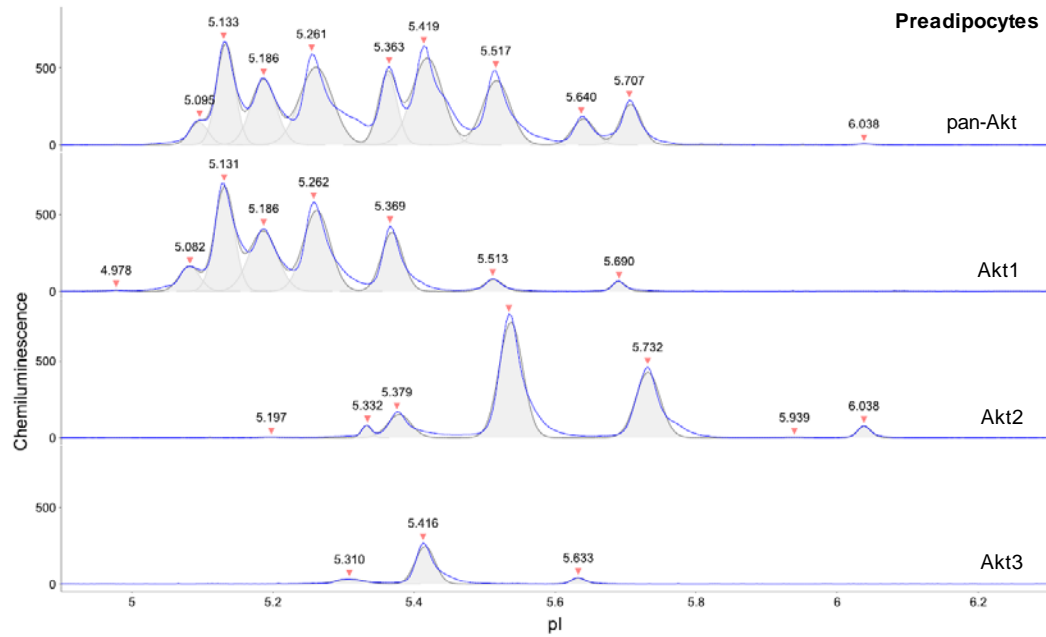**J**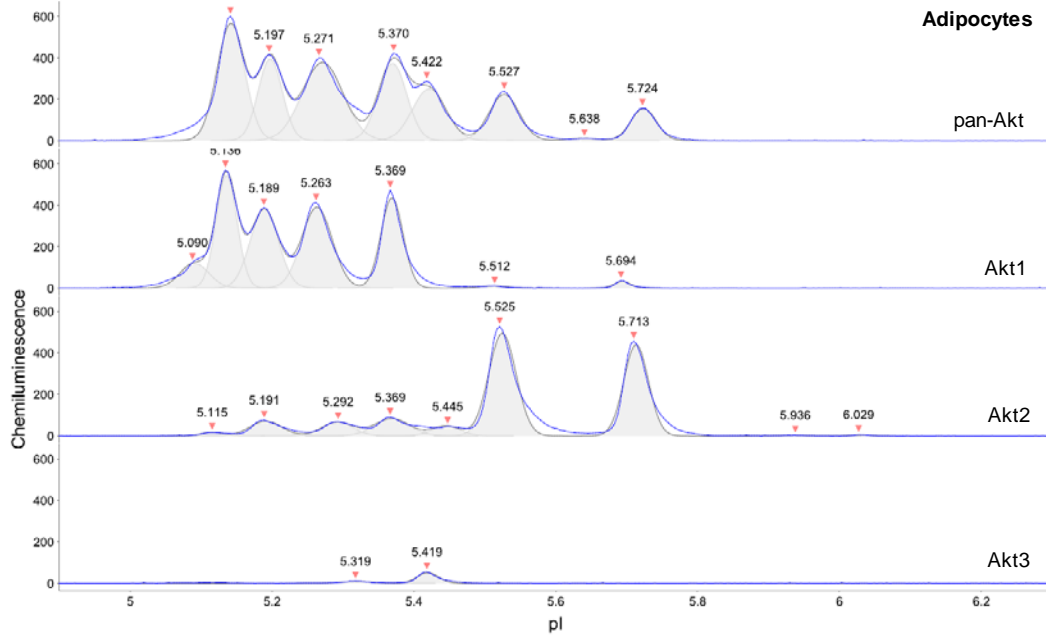

**Supplementary Figure S1.** Akt isoform identification using capillary isoelectric focusing (cIEF) immunoassays. Primary antibodies against pan-Akt (top panel), Akt1 (second panel), Akt2 (third panel), and Akt3 (fourth panel) were used. cIEF electropherograms of pan-Akt, Akt1, Akt2, and Akt3 in (A) SH-SY5Y neuronal cells, (B) HepG2 liver cells, (C) HMC3 microglial cells, (D) Jurkat T cells, (E) Caco-2 intestinal cells, (F) A549 lung cells, (G) HEK293 kidney cells, (H) MDA-MB-231 breast epithelial cells, (I) subcutaneous preadipocytes, and (J) subcutaneous adipocytes.

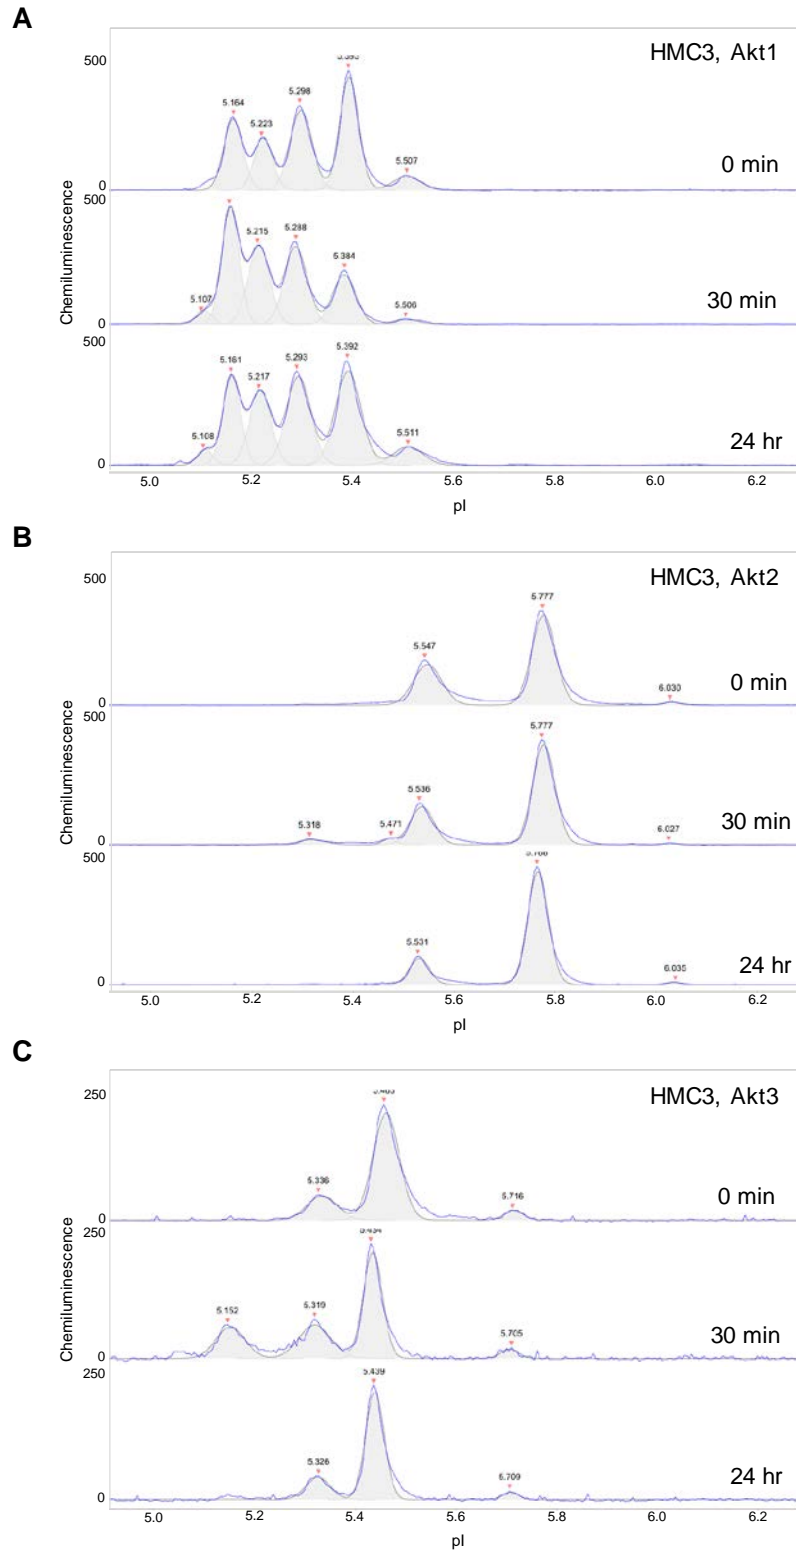

**Supplementary Figure S2.** Copaiba essential oil treatment transiently increases the phosphorylation of Akt1, Akt2, and Akt3 in HMC3 microglial cells. cIEF electropherograms of (A) Akt1, (B) Akt2, and (C) Akt3 as functions of time after treatment with copaiba essential oil.

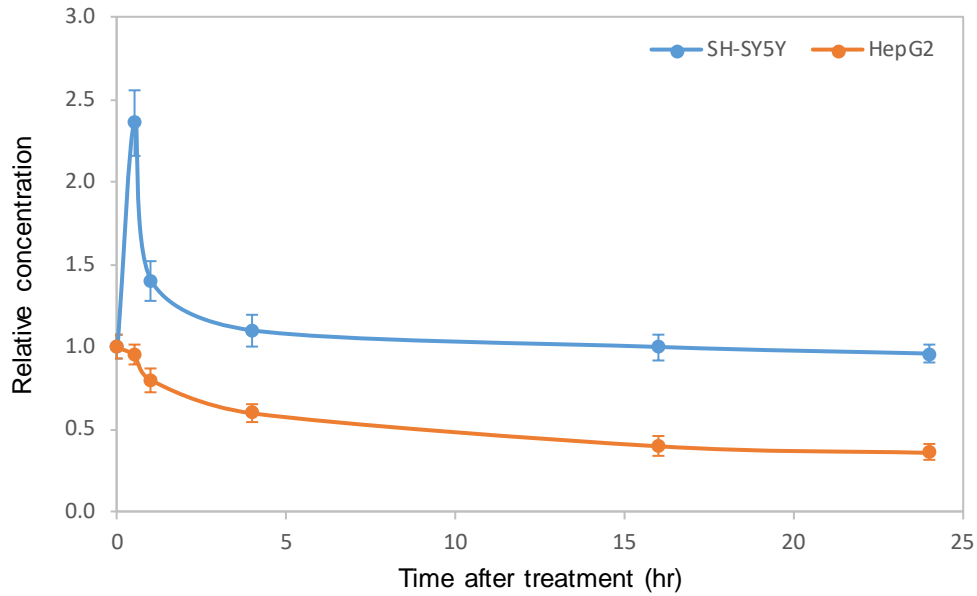

**Supplementary Figure S3.** Time-dependent regulation of Akt1 phosphorylation by copaiba essential oil in SH-SY5Y versus HepG2 cells. Relative concentration of Akt1 phosphoisoforms as a function of time after treatment with 100 ng/ml copaiba essential oil in SH-SY5Y (blue) versus HepG2 (orange) cells. The relative concentration describes the fold change in Akt1 phosphoisoforms after treatment compared to the control condition. The error bars are the standard deviations of six repeated measurements per experimental condition.



**A**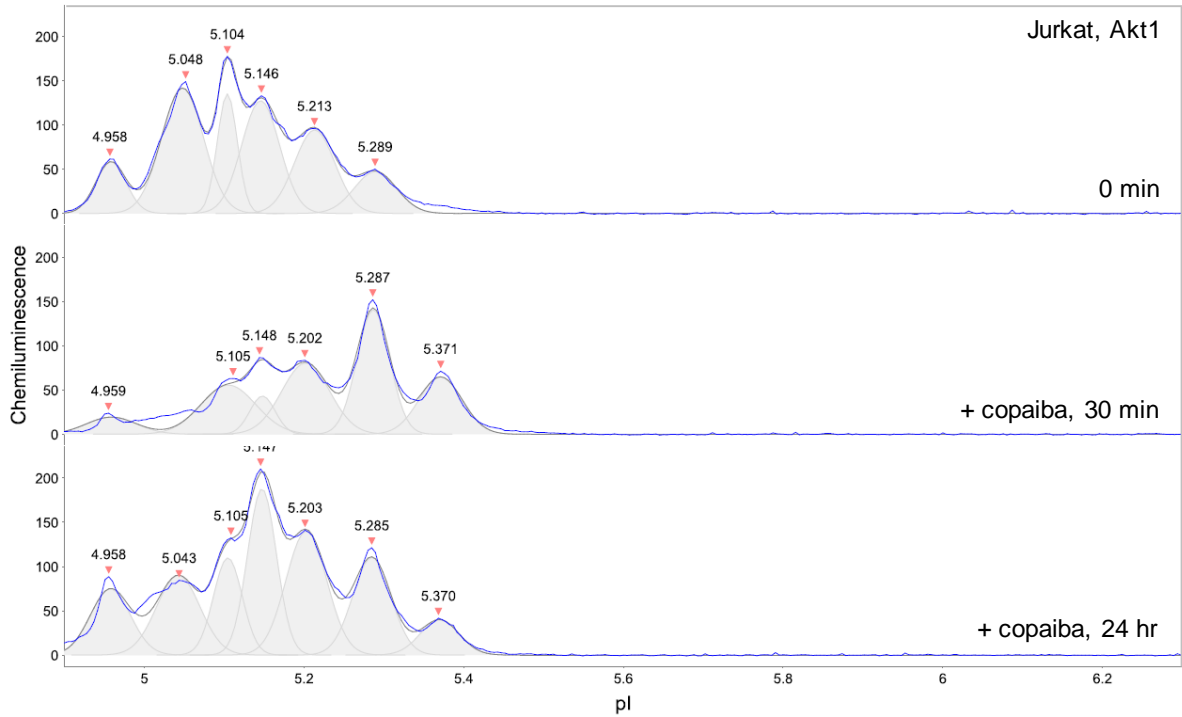**B**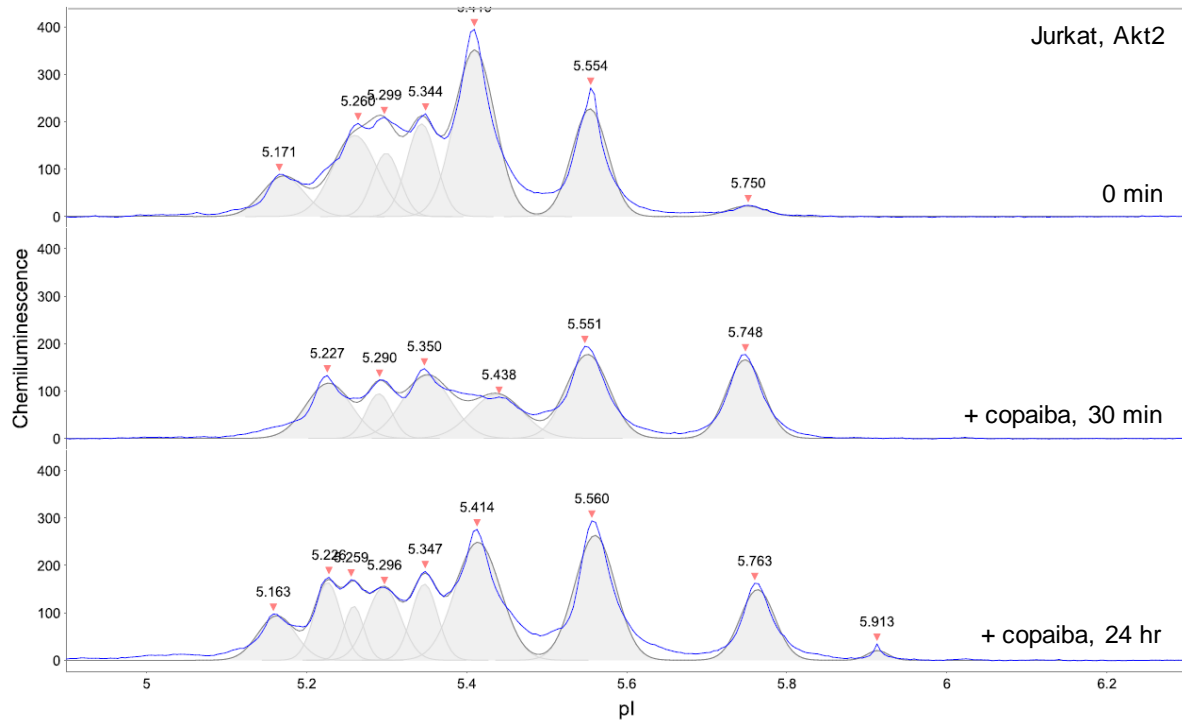

**Supplementary Figure S4.** Copaiba essential oil treatment reduces the phosphorylation of Akt1 and Akt2 in Jurkat T lymphocytes. cIEF electropherograms of (A) Akt1 and (B) Akt2 as functions of time after treatment with copaiba essential oil.

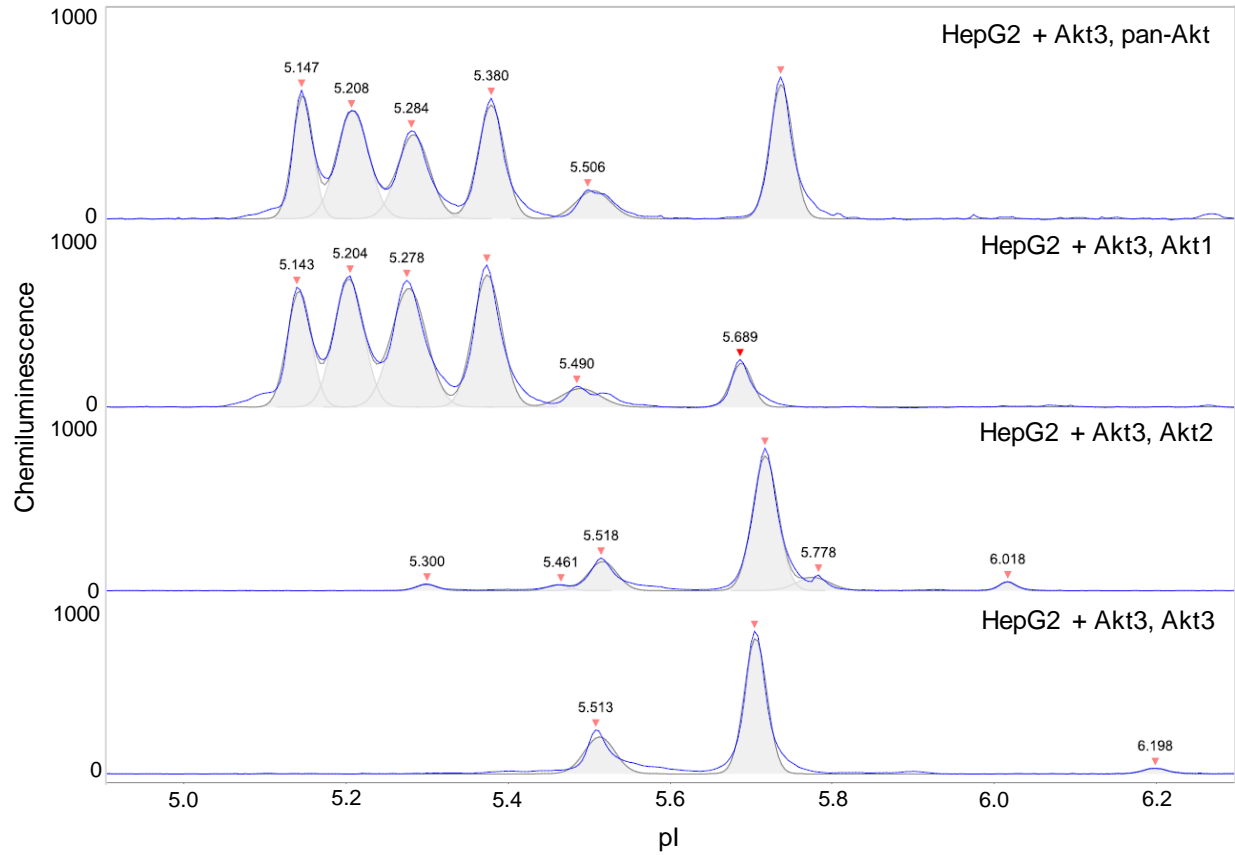

**Supplementary Figure S5.** Akt isoform identification in HepG2 cells transfected with Akt3-encoding plasmid DNA. cIEF electropherograms of pan-Akt (top panel), Akt1 (second panel), Akt2 (third panel), and Akt3 (fourth panel).

**Supplementary Table S1.** List of culture media

| Cell Types    | Culture Medium                                                                                  | Supplement                                                                               | Atmosphere                  |
|---------------|-------------------------------------------------------------------------------------------------|------------------------------------------------------------------------------------------|-----------------------------|
| SH-SY5Y       | 1:1 mixture of EMEM (cat. no. 302003, ATCC, Manassas, VA, USA) and F12K (cat. no. 302004, ATCC) | 10% Fetal bovine serum (FBS, cat. no. SH30888.03, GE Life Sciences, Pittsburgh, PA, USA) | 95% air, 5% CO <sub>2</sub> |
| HepG2         | RPMI1640 (cat. no. 11875, Gibco, Dublin, Ireland)                                               | 10% FBS & 1% MEM nonessential amino acids (cat. no. 25-025-CIR, Corning, NY, USA)        | 95% air, 5% CO <sub>2</sub> |
| HMC3          | EMEM                                                                                            | 10% FBS                                                                                  | 95% air, 5% CO <sub>2</sub> |
| Jurkat        | RPMI1640                                                                                        | 10% FBS                                                                                  | 95% air, 5% CO <sub>2</sub> |
| Caco-2        | EMEM                                                                                            | 20% FBS                                                                                  | 95% air, 5% CO <sub>2</sub> |
| A549          | F12K                                                                                            | 10% FBS                                                                                  | 95% air, 5% CO <sub>2</sub> |
| HEK293        | EMEM                                                                                            | 10% FBS                                                                                  | 95% air, 5% CO <sub>2</sub> |
| MDA-MB-231    | RPMI1640                                                                                        | 10% FBS                                                                                  | 95% air, 5% CO <sub>2</sub> |
| Preadipocytes | PM1 (Zen-Bio, Research Triangle, NC, USA)                                                       | N/A                                                                                      | 95% air, 5% CO <sub>2</sub> |
| Adipocytes    | AM1 (Zen-Bio)                                                                                   | N/A                                                                                      | 95% air, 5% CO <sub>2</sub> |

**Supplementary Table S2.** List of primary and secondary antibodies

| N <sup>o</sup> | Antibody                             | Cat. No. | Vendor                           |
|----------------|--------------------------------------|----------|----------------------------------|
| 1              | pan-Akt                              | 8312     | Santa Cruz Biotech (Dallas, TX)  |
| 2              | Akt1                                 | 2938     | Cell Signaling (Danvers, MA)     |
| 3              | Akt2                                 | 3063     | Cell Signaling                   |
| 4              | Akt3                                 | 8018     | Cell Signaling                   |
| 5              | mTOR                                 | 2983     | Cell Signaling                   |
| 6              | p-mTOR (Ser2448)                     | 5536     | Cell Signaling                   |
| 7              | p70S6K                               | 9202     | Cell Signaling                   |
| 8              | p-p70S6K (Thr389)                    | 9234     | Cell Signaling                   |
| 9              | ERK1/2                               | 040-474  | Protein Simple (Santa Clara, CA) |
| 10             | STAT3                                | 4904     | Cell Signaling                   |
| 11             | $\beta$ -actin                       | MAB8929  | R&D Systems (Minneapolis, MN)    |
| 12             | HSP60                                | F1800    | R&D Systems                      |
| 13             | HSP70                                | 4872     | Cell Signaling                   |
| 14             | Secondary antibody (anti-rabbit HRP) | 040-656  | Protein Simple                   |
| 15             | Secondary antibody (anti-rabbit HRP) | 042-206  | Protein Simple                   |
| 16             | Secondary antibody (anti-mouse HRP)  | 042-205  | Protein Simple                   |
| 17             | Secondary antibody (anti-rabbit NIR) | 043-819  | Protein Simple                   |
| 18             | Secondary antibody (anti-mouse NIR)  | 043-821  | Protein Simple                   |

**Supplementary Table S3.** List of biomarker proteins and their functions

| N <sup>o</sup> | Protein | Name                                               | Function                                      |
|----------------|---------|----------------------------------------------------|-----------------------------------------------|
| 1              | Akt1    | Protein kinase B, isoform 1                        | Apoptosis, proliferation, & cell migration    |
| 2              | Akt2    | Protein kinase B, isoform 2                        | Glucose metabolism                            |
| 3              | Akt3    | Protein kinase B, isoform 3                        | Neuronal development                          |
| 4              | mTOR    | Mechanistic target of rapamycin                    | Proliferation, motility, survival, autophagy, |
| 5              | p70S6K  | Ribosomal S6 kinase $\beta$ -1                     | Protein synthesis                             |
| 6              | ERK1/2  | Mitogen-activated protein kinase 1/2               | Proliferation, differentiation, development   |
| 7              | STAT3   | Signal transducer and activator of transcription 3 | Immunity, proliferation, differentiation      |
